# Supplementary material for: Genome-wide identification and expression analysis of the Trihelix transcription factor family in potato (Solanum tuberosum L.) during development
Source: PubMed Central journal article supplement (PMC11610473; doi:10.7717/peerj.18578), 2024-11-29

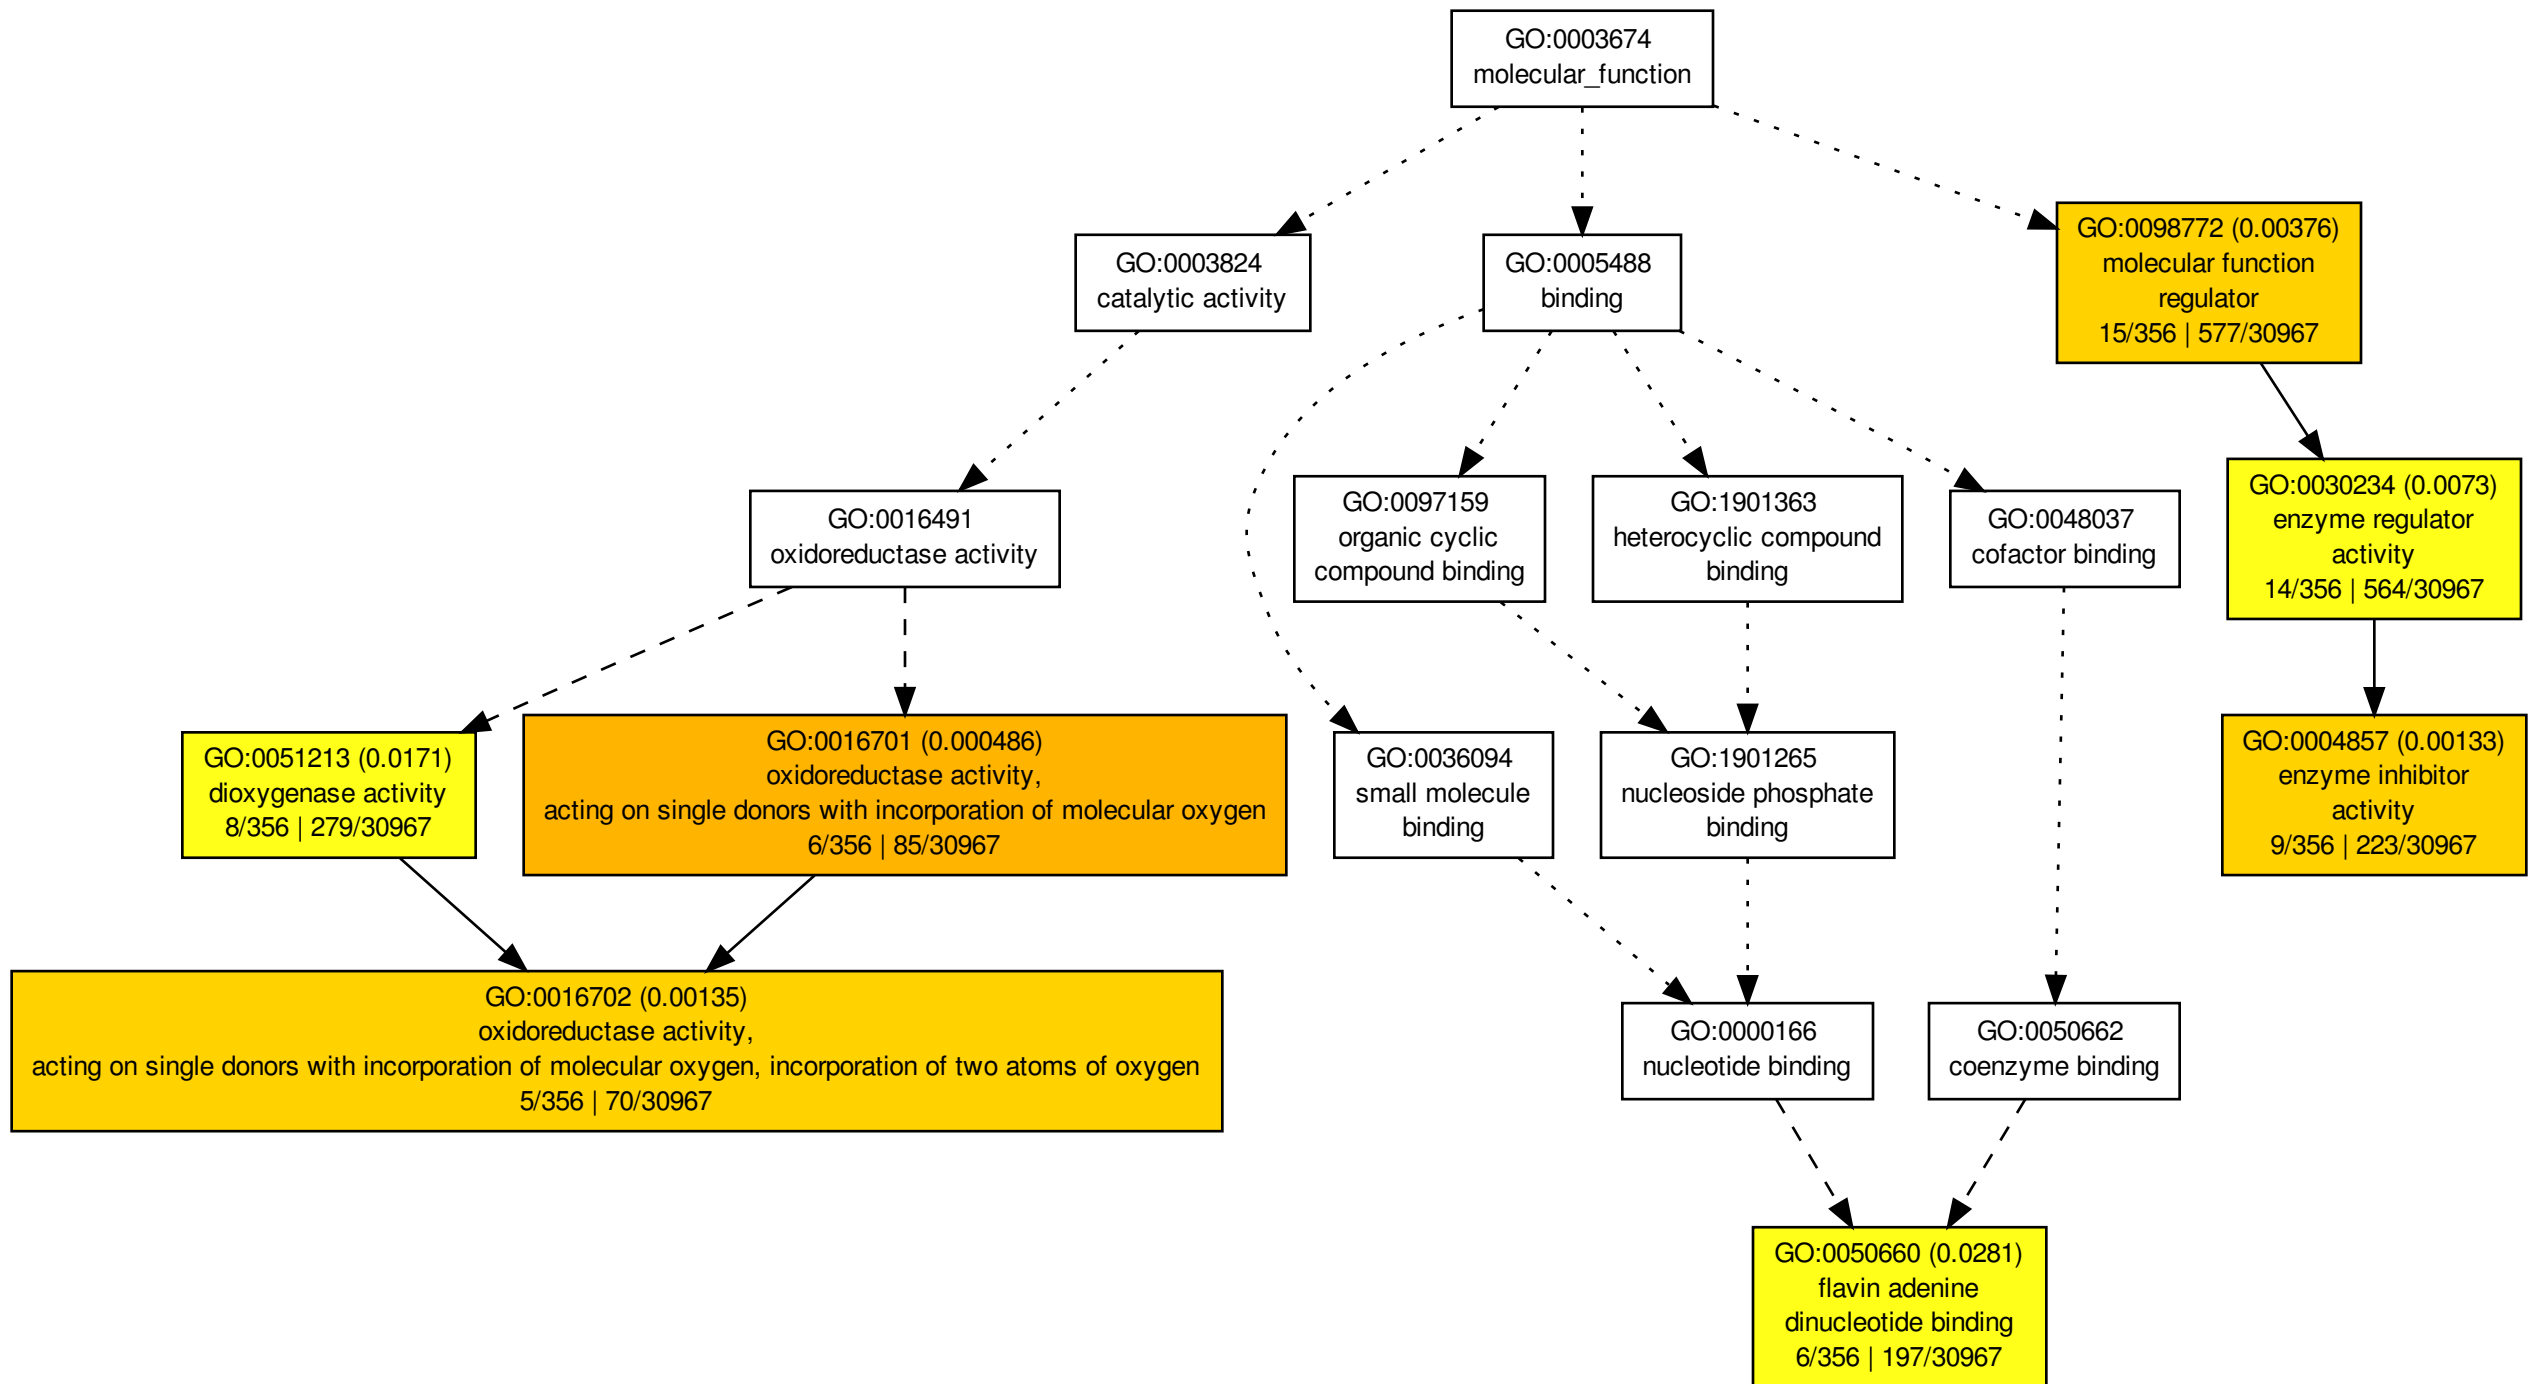

Supplement: peerj-12-18578-s002.pdf [file peerj-12-18578-s002.pdf]
