# Supplementary material for: Genome-wide identification and expression analysis of the Trihelix transcription factor family in potato (Solanum tuberosum L.) during development
Source: PeerJ. 2024 Nov 29;12:e18578. doi: 10.7717/peerj.18578 (PMC11610473; doi:10.7717/peerj.18578)
Supplement: Supplemental Information 7 [file peerj-12-18578-s007.xls]

## Sheet: Sheet1
ITEM TO CHECK	IMPORTANCE	CHECKLIST
EXPERIMENTAL DESIGN
Definition of experimental and control groups	E	Control Group: Specimens without sodium chloride (NaCl) exposure for a duration of 24 hours; Experimental Group: Specimens exposed to sodium chloride (NaCl) for a duration of 24 hours.
Number within each group	E	This investigation encompasses the scrutiny of eight genes of interest, complemented by a single housekeeping gene, within each experimental cohort, which is meticulously constituted by triplicate independent samples to ensure the robustness and reliability of the findings.
Assay carried out by core lab or investigator's lab?	D	Assays were carried out by the investigator's lab.
Acknowledgement of authors' contributions	D	Authors' contributions were described during the submission process of the manuscript.
SAMPLE
Description	E	Leaf tissue was extracted from plants subjected to a 24 hour NaCl treatment for comparison with untreated control specimens.
Volume/mass of sample processed	D	The shoot of potato
Microdissection or macrodissection	E	Utilizing a traditional mortar and pestle, cellular material was meticulously extracted from the frozen leaf tissue, a method that ensures the preservation of cellular integrity prior to further analysis.
Processing procedure	E	Fresh leaves are harvested from the plant and are immediately snap-frozen in liquid nitrogen, followed by storage at -80℃.
If frozen - how and how quickly?	E	The leaf tissue was swiftly cryopreserved using liquid nitrogen to maintain cellular integrity.
If fixed - with what, how quickly?	E	Employing a mortar and pestle, the samples underwent a meticulous grinding process, which was succeeded by a comprehensive mixing to ensure a homogeneous distribution of the sample components.
Sample storage conditions and duration (especially for FFPE samples)	E	The samples are preserved in a -80℃ freezer and taken out when RNA extraction is to be performed.
NUCLEIC ACID EXTRACTION
Procedure and/or instrumentation	E	Total RNA was isolated from the collected samples using Trizol Reagents. 3.1
Name of kit and details of any modifications	E	Employing the Qiagen AllPrep RNA Mini Kit for the procedure. No modifications.
Source of additional reagents used	D	Not applicable.
Details of DNase or RNAse treatment	E	Employ the DNase I enzyme furnished by the kit to meticulously excise genomic DNA.
Contamination assessment (DNA or RNA)	E	Employ agarose gel electrophoresis and spectrophotometry for the DNA contamination.
Nucleic acid quantification	E	After digestion with DNaseI, the quantified of the RNA was evaluated by using NanoDrop.
Instrument and method	E	Employ the NanoDrop One spectrophotometer by Thermo Fisher Scientific for the precise measurement of the A260/A280 ratio.
Purity (A260/A280)	D	Not applicable.
Yield	D	Not applicable.
RNA integrity method/instrument	E	Perform RNA integrity analysis using the Agilent 2100 Bioanalyzer.
RIN/RQI or Cq of 3' and 5' transcripts	E	RNA integrity is meticulously evaluated using the Agilent 2100 Bioanalyzer, with the stipulation that the RIN value must surpass 7.5 for acceptable sample integrity.
Electrophoresis traces	D	Not applicable.
Inhibition testing (Cq dilutions, spike or other)	E	Employing Cq dilutions, assess the inhibitory effects at various dilution levels by diluting the samples.
REVERSE TRANSCRIPTION
Complete reaction conditions	E	Total RNA was reverse transcribed by M-MLV reverse transcriptase (Promega, United States).
Amount of RNA and reaction volume	E	2 μg of RNA is reverse-transcribed within a 20 μl reaction system.
Priming oligonucleotide (if using GSP) and concentration	E	The concentration of the reverse transcription primer is 2.5 μM.
Reverse transcriptase and concentration	E	Using the reverse transcriptase provided by the kit, and the concentration is 200u/μl.
Temperature and time	E	Heat the tube to 70°C for 5 minutes to denature the secondary structure of the template DNA. Immediately transfer the tube to an ice bath to prevent renaturation of the secondary structure, then briefly centrifuge to collect the solution at the tube's bottom.
Manufacturer of reagents and catalogue numbers	D
Cqs with and without RT	D*
Storage conditions of cDNA	D	cDNA was put at -20°C immediately after reverse transcription, diluted at 0.5 µg/µl in DNAse free water, then stored at -80°C for long term use.
qPCR TARGET INFORMATION
If multiplex, efficiency and LOD of each assay.	E	We did not employ multiple detection methods.
Sequence accession number	E	Accession numbers for designed primers were reported in the manuscript (Tables S1).
Location of amplicon	D
Amplicon length	E	Amplicon lengths for designed primers were reported in the manuscript (Tables S1).
In silico specificity screen (BLAST, etc)	E	The BLAST program were used.
Pseudogenes, retropseudogenes or other homologs?	D	A BLAST analysis showed no homology with pseudogenes.
Sequence alignment	D
Secondary structure analysis of amplicon	D
Location of each primer by exon or intron (if applicable)	E	The primer design is strategically positioned across the final intron, with locations specified on both the terminal and antepenultimate exons.
What splice variants are targeted?	E	The gene of interest in our study does not encompass splice variants, indicating a focused examination on the primary transcript without alternative splicing considerations.
qPCR OLIGONUCLEOTIDES
Primer sequences	E	Sequences for previously and newly designed primers were reported in the manuscript (Tables S1)
RTPrimerDB Identification Number	D	Not applicable.
Probe sequences	D**	Not applicable.
Location and identity of any modifications	E	No modification was done.
Manufacturer of oligonucleotides	D
Purification method	D
qPCR PROTOCOL
Complete reaction conditions	E	The qRT-PCR was performed using SYBR Green (TaKaRa, Japan) and Q2000B Fluorescence Quantitative PCR System (LongGene, China).
Reaction volume and amount of cDNA/DNA	E	100 ng cDNA in 20 μl qPCR reaction
Primer, (probe), Mg++ and dNTP concentrations	E	0.5 μM Primer, 1.5 mM Mg++ and 300 μM dNTP in 20 μl qPCR reaction
Polymerase identity and concentration	E	Employing SYBR Green I in the assay obviates the need for supplementary polymerase, given that the dye's affinity for DNA serves as a reliable indicator of successful amplification.
Buffer/kit identity and manufacturer	E	SYBRR Premix Ex TaqTM II (TaKaRa, Japan)
Exact chemical constitution of the buffer	D
Additives (SYBR Green I, DMSO, etc.)	E	SYBR Green I, DMSO
Manufacturer of plates/tubes and catalog number	D
Complete thermocycling parameters	E	The qPCR protocol was initiated with a denaturation step at 95°C for 10 minutes, followed by 40 cycles consisting of 95°C for 15 seconds, annealing at 55°C for 15 seconds, and extension at 72°C for 30 seconds.
Reaction setup (manual/robotic)	D
Manufacturer of qPCR instrument	E	Q2000B Fluorescence Quantitative PCR System (LongGene, China)
qPCR VALIDATION
Evidence of optimisation (from gradients)	D	Not determined.
Specificity (gel, sequence, melt, or digest)	E	We employ melting curve analysis to ascertain the specificity of gene amplification within our experiments.
For SYBR Green I, Cq of the NTC	E	Cq of the NTC (No Template Control) is ND.
Standard curves with slope and y-intercept	E	We have not established a standard curve.
PCR efficiency calculated from slope	E	We have not performed the calculation of PCR efficiency based on the slope.
Confidence interval for PCR efficiency or standard error	D
r2 of standard curve	E	We have not created a standard curve for each pair of primers.
Linear dynamic range	E	The linear dynamic range encompasses (CT) values ranging from 15 to 35.
Cq variation at lower limit	E	The Cq variation at lower limit (CT) values is 39.
Confidence intervals throughout range	D	Not determined.
Evidence for limit of detection	E	We have not embarked on experiments within this particular field. Not determined since Cqs of the samples were in the dynamic range below the lowest concentration.
If multiplex, efficiency and LOD of each assay.	E	The samples have not been processed through a procedure involving mixed amplification.
DATA ANALYSIS
qPCR analysis program (source, version)	E	The data were analyzed utilizing the LongGene qPCR Processing Software, version 1.3.
Cq method determination	E	The specific cycle at which the fluorescence signal surpasses the threshold level is identified during the course of PCR amplification.
Outlier identification and disposition	E	The amplification curve deviates from the norm, failing to present the expected sigmoidal pattern. There is a discrepancy exceeding 10% between the replicate wells. The experiment should be conducted again to ensure accuracy.
Results of NTCs	E	The cycle threshold (CT) values for the triplicate wells are recorded as 39.56, 38.8, and 39.84 respectively.
Justification of number and choice of reference genes	E	Drawing from the lab's earlier research, we have identified and chosen a housekeeping gene to employ in our experimental procedures.
Description of normalisation method	E	A housekeeping gene Actin was selected to act as a reference for normalization purposes. Data analysis was conducted employing the ΔΔCT quantitative method. The ΔCT values were ascertained utilizing the CT values of the gene under investigation and the housekeeping gene. Subsequently, the ΔΔCT values were computed from the ΔCT values of the experimental and control groups to assess the differenti…
Number and concordance of biological replicates	D
Number and stage (RT or qPCR) of technical replicates	E	Each sample was subjected to triplicate analysis to ensure the reliability of the results.
Repeatability (intra-assay variation)	E	The reliability of the experimental data is gauged by determining the standard deviation (SD) across the replicate wells.
Reproducibility (inter-assay variation, %CV)	D
Power analysis	D
Statistical methods for result significance	E	Significance is evaluated using the t-test to ascertain the statistical reliability of the observed differences
Software (source, version)	E	Excel-office2021
Cq or raw data submission using RDML	D
Table 1. MIQE checklist for authors, reviewers and editors. All essential information (E) must be submitted with the manuscript. Desirable
information (D) should be submitted if available. If using primers obtained from RTPrimerDB, information on qPCR target, oligonucleotides,
protocols and validation is available from that source.
*: Assessing the absence of DNA using a no RT assay is essential when first extracting RNA. Once the sample has been validated as
RDNA-free, inclusion of a no-RT control is desirable, but no longer essential.
**: Disclosure of the probe sequence is highly desirable and strongly encouraged. However, since not all commercial pre-designed assay
vendors provide this information, it cannot be an essential requirement. Use of such assays is advised against.
